# Supplementary material
Source: publisher site journal article supplement (https://www.spandidos-publications.com/3876/downloadSupplementary)
Supplement: Supplementary file 1 [file downloadSupplementary]

## Sheet: Pearson's correlation(132miRs)
Table SII. The correlation analysis between radiation dose and miRNA expression in 132 detected miRNAs.
	Pearson's significant correlation (0 Gy to 6 Gy)			Pearson's significant correlation (0 Gy to 10 Gy)
systematic_name	Correlation coefficient: R	P-value	significance (P<0.05)	Correlation coefficient: R	P-value	significance (P<0.05)
hsa-let-7b	-0.57566	0.05016		-0.34475	0.19098
hsa-miR-1181	0.52317	0.08091		0.31526	0.23429
hsa-miR-1183	0.59626	0.04073	*	0.5245	0.037	*
hsa-miR-1202	0.55255	0.06246		0.15888	0.55672
hsa-miR-1207-5p	0.70109	0.01108	*	0.3756	0.15167
hsa-miR-1224-5p	0.61003	0.03517	*	0.21977	0.41346
hsa-miR-1225-3p	0.65037	0.02203	*	0.17282	0.52215
hsa-miR-1225-5p	0.63017	0.02806	*	0.16931	0.53076
hsa-miR-1226*	0.68434	0.0141	*	0.44112	0.0872
hsa-miR-1228	0.5581	0.05933		0.03053	0.91062
hsa-miR-1229	0.72249	0.00795	*	0.5562	0.02526	*
hsa-miR-1234	0.40505	0.19149		-0.13	0.63132
hsa-miR-1237	0.62693	0.02913	*	0.07903	0.7711
hsa-miR-1238	0.60033	0.03903	*	0.14505	0.59197
hsa-miR-1246	-0.52772	0.07784		-0.18707	0.48785
hsa-miR-1249	0.50509	0.09395		-0.04505	0.86843
hsa-miR-125a-3p	0.77676	0.00296	*	0.44324	0.08552
hsa-miR-1268	0.40777	0.18824		0.03631	0.89379
hsa-miR-1274b_v16.0	-0.28752	0.36484		-0.31263	0.23842
hsa-miR-1275	0.51604	0.08589		0.13856	0.60883
hsa-miR-1288	0.66563	0.01814	*	0.59788	0.01444	*
hsa-miR-1290	-0.4865	0.10875		-0.2074	0.44087
hsa-miR-1305	0.67817	0.01535	*	0.49703	0.05015
hsa-miR-134	0.75029	0.00494	*	0.46571	0.06907
hsa-miR-135a*	0.63529	0.02643	*	0.16698	0.53651
hsa-miR-141	-0.51558	0.08622		-0.28224	0.28955
hsa-miR-1471	0.17967	0.57634		-0.1823	0.4992
hsa-miR-150*	0.74395	0.00553	*	0.30835	0.24526
hsa-miR-151-3p	-0.14916	0.64359		0.15267	0.57243
hsa-miR-17	-0.45895	0.1334		-0.22452	0.40316
hsa-miR-188-5p	0.67491	0.01604	*	0.45818	0.0743
hsa-miR-191*	0.59602	0.04083	*	0.13458	0.61924
hsa-miR-1914*	0.4403	0.15201		0.07697	0.77694
hsa-miR-1915	0.65537	0.02069	*	0.21757	0.41827
hsa-miR-197	0.63046	0.02796	*	0.54419	0.02931	*
hsa-miR-1972	-0.48661	0.10865		-0.14045	0.60388
hsa-miR-198	0.33105	0.29321		-0.06905	0.79941
hsa-miR-21 (hsa-miR-21-5p)	-0.52527	0.07948		-0.37482	0.15259
hsa-miR-21* (hsa-miR-21-3p)	-0.14309	0.65731		-0.37848	0.14831
hsa-miR-22 (hsa-miR-22-3p)	-0.25484	0.42408		0.17192	0.52434
hsa-miR-222 (hsa-miR-222-3p)	-0.43758	0.15484		0.12405	0.64714
hsa-miR-2276 (hsa-miR-2276-3p)	0.64384	0.02386	*	0.24017	0.37028
hsa-miR-23a (hsa-miR-23a-3p)	-0.41641	0.17813		-0.14543	0.59099
hsa-miR-2861	0.72522	0.00761	*	0.25944	0.33187
hsa-miR-296-5p	0.54263	0.06832		0.03232	0.90541
hsa-miR-29a (hsa-miR-29a-3p)	-0.60929	0.03546	*	-0.36915	0.1594
hsa-miR-30d (hsa-miR-30d-5p)	0.20412	0.52455		0.33793	0.20049
hsa-miR-3125	0.64516	0.02348	*	0.5474	0.02818	*
hsa-miR-3131	0.27541	0.38627		-0.08829	0.74507
hsa-miR-3137	0.6945	0.0122	*	0.32485	0.21958
hsa-miR-3138	0.43744	0.155		0.03763	0.88997
hsa-miR-3141	0.64574	0.02332	*	0.34725	0.18757
hsa-miR-3148	-0.14402	0.6552		-0.22156	0.40955
hsa-miR-3149	-0.21657	0.49898		-0.23293	0.38529
hsa-miR-3156-5p	-0.19561	0.54235		0.26892	0.31386
hsa-miR-3162-5p	0.55089	0.06341		0.12868	0.63482
hsa-miR-3180-3p	0.57116	0.05241		0.12559	0.64303
hsa-miR-3188	0.62624	0.02936	*	0.19387	0.47186
hsa-miR-3194-5p	0.62328	0.03037	*	0.27626	0.30032
hsa-miR-3195	0.73035	0.00699	*	0.34543	0.19005
hsa-miR-3196	0.5173	0.085		0.17503	0.51675
hsa-miR-3198	0.6602	0.01946	*	0.51364	0.04184	*
hsa-miR-32* (hsa-miR-32-3p)	-0.12846	0.69072		-0.12899	0.63401
hsa-miR-3202	0.55752	0.05965		0.17632	0.51363
hsa-miR-320a (hsa-miR-320a-3p or hsa-miR-320a-5p)	0.51425	0.08717		0.06424	0.81316
hsa-miR-320b	-0.0839	0.79545		-0.11822	0.66279
hsa-miR-320c	0.44273	0.1495		-0.01564	0.95414
hsa-miR-320d	-0.57197	0.052		-0.15734	0.5606
hsa-miR-320e	-0.59179	0.04266	*	-0.152	0.57414
hsa-miR-3605-5p	0.45582	0.13641		0.38214	0.1441
hsa-miR-3610	0.77392	0.00314	*	0.52569	0.03649	*
hsa-miR-3646	0.46675	0.12609		0.07559	0.78083
hsa-miR-3648	0.62015	0.03145	*	0.31838	0.22944
hsa-miR-3652	0.47629	0.1175		0.10441	0.70037
hsa-miR-3656	0.41511	0.17963		0.32093	0.22552
hsa-miR-3663-3p	0.63758	0.02572	*	0.42436	0.10137
hsa-miR-3665	0.67043	0.01703	*	0.37703	0.15
hsa-miR-3667-5p	0.46266	0.12989		-0.02282	0.93315
hsa-miR-3676	0.57495	0.05051		0.08957	0.74148
hsa-miR-3679-5p	0.5912	0.04292	*	0.29868	0.26113
hsa-miR-370 (hsa-miR-370-3p or hsa-miR-370-5p)	0.49159	0.10455		0.21728	0.4189
hsa-miR-371-5p	0.36839	0.23869		0.25314	0.34418
hsa-miR-373*	0.64414	0.02378	*	0.3786	0.14817
hsa-miR-378	0.12794	0.69191		0.19685	0.46494
hsa-miR-3911	0.65243	0.02147	*	0.30545	0.24996
hsa-miR-3917	0.7075	0.01006	*	0.41954	0.10572
hsa-miR-3937	0.76715	0.00359	*	0.27721	0.29859
hsa-miR-3945	0.68131	0.0147	*	0.15265	0.57249
hsa-miR-422a	0.73272	0.00672	*	0.51843	0.03965	*
hsa-miR-423-5p	0.90265	5.83615e-05	*	0.60908	0.01227	*
hsa-miR-4257	0.64792	0.02271	*	0.16126	0.55076
hsa-miR-4270	0.45907	0.13329		0.10293	0.70444
hsa-miR-4271	0.61215	0.03437	*	0.23651	0.37782
hsa-miR-4274	0.57291	0.05153		-0.00999	0.97071
hsa-miR-4281	0.57403	0.05096		0.15506	0.56637
hsa-miR-4286	-0.64707	0.02294	*	-0.31963	0.22751
hsa-miR-4294	0.51597	0.08595		0.52225	0.03797	*
hsa-miR-4298	0.51933	0.08357		0.24074	0.36911
hsa-miR-4306	0.55111	0.06328		0.14141	0.60139
hsa-miR-4322	0.67237	0.0166	*	0.31919	0.22818
hsa-miR-4327	0.72559	0.00756	*	0.29069	0.27473
hsa-miR-483-5p	0.59033	0.0433	*	0.21642	0.42077
hsa-miR-494	-0.57797	0.04903	*	-0.24505	0.36032
hsa-miR-514b-5p	0.57813	0.04896	*	0.22906	0.39346
hsa-miR-516a-5p	0.43092	0.16195		0.21708	0.41933
hsa-miR-520b	0.72227	0.00798	*	0.43176	0.09492
hsa-miR-520e	0.70387	0.01063	*	0.39898	0.12581
hsa-miR-557	0.70303	0.01076	*	0.31006	0.24251
hsa-miR-564	0.18114	0.57315		-0.15199	0.57416
hsa-miR-572	0.70077	0.01113	*	0.52905	0.0351	*
hsa-miR-574-5p	-0.34612	0.27043		-0.31045	0.24189
hsa-miR-575	0.68666	0.01365	*	0.13115	0.62829
hsa-miR-595	-0.03046	0.92513		-0.04901	0.85697
hsa-miR-601	0.75202	0.00479	*	0.44869	0.08129
hsa-miR-622	0.52152	0.08204		0.12522	0.64402
hsa-miR-623	0.56541	0.05538		0.21791	0.4175
hsa-miR-629* (hsa-miR-629-3p)	0.61217	0.03436	*	0.61215	0.01172	*
hsa-miR-630	0.71511	0.00894	*	0.49146	0.05319
hsa-miR-638	0.73778	0.00616	*	0.35168	0.18163
hsa-miR-642b	0.52294	0.08107		0.091	0.73751
hsa-miR-659 (hsa-miR-659-3p)	0.42599	0.16734		0.29879	0.26095
hsa-miR-663 (hsa-miR-663a)	0.08943	0.78226		-0.25071	0.34899
hsa-miR-671-5p	0.55182	0.06287		0.25044	0.34951
hsa-miR-718	0.51294	0.08812		0.18336	0.49667
hsa-miR-762	0.70968	0.00973	*	0.36538	0.16403
hsa-miR-765	0.55914	0.05875		0.27697	0.29904
hsa-miR-874	0.82512	0.000952838	*	0.49029	0.05385
hsa-miR-877 (hsa-miR-877-5p)	0.44834	0.14379		0.13584	0.61593
hsa-miR-887 (hsa-miR-887-3p or hsa-miR-887-5p)	0.51591	0.08599		0.02433	0.92875
hsa-miR-92a	-0.26126	0.41209		0.15007	0.57908
hsa-miR-939	0.66693	0.01784	*	0.52244	0.03788	*
hsa-miR-940	0.59367	0.04184	*	0.19194	0.47639
